# Supplementary material for: Availability of Clinical Trial Data From Industry‐Sponsored Cardiovascular Trials
Source: PubMed Central journal article supplement — J Am Heart Assoc. 2016 Apr 20;5(4):e003307. doi: 10.1161/JAHA.116.003307 (PMC4859296; doi:10.1161/jaha.116.003307), 2016-04-20
Supplement: JAH3-5-e003307-s001.pdf [file JAH3-5-e003307-s001.pdf]

## SUPPLEMENTARY MATERIAL

Standard Request Email

Month, Date, 2015

To whom it may concern,

I am a Cardiovascular Research Fellow at the Yale-Center for Outcomes Research and Evaluation (CORE).

We are writing a perspective piece to encourage cardiology researchers to utilize data from clinical trials made available by large pharmaceutical companies in their research projects. Toward this end, we would like to write a paper that chronicles whether patient-level data from the following cardiology trials conducted by your company are available upon request to researchers outside of your company:

- 1.
- 2.
- 3.

Please let us know whether these trials are available. If so, what are the next steps for submitting a formal request?

Thank you and I look forward to hearing from you.

Sincerely,
